# Supplementary material for: What Do People Know about Food, Nutrition and Health?—General Nutrition Knowledge in the Austrian Population
Source: MDPI journal article supplement (doi:10.3390/nu14224729), 2022-11-09
Supplement: s1 [file s1]

Supplementary Table S1: Number of responses for each question of the German version of the General Nutrition Knowledge Questionnaire (correct answers are marked in green).

| Question                                                                                                        | Options  | Medical doctors | Pharmacists | Dieticians | Nutritionists | School teachers | General population |
|-----------------------------------------------------------------------------------------------------------------|----------|-----------------|-------------|------------|---------------|-----------------|--------------------|
|                                                                                                                 |          | n               | n           | n          | n             | n               | n                  |
| Total n                                                                                                         |          |                 |             |            |               |                 |                    |
| Section 1: The first few items are about what advice you think experts are giving us.                           |          |                 |             |            |               |                 |                    |
| Do health experts recommend that people should be eating more. the same amount. or less of the following foods? |          |                 |             |            |               |                 |                    |
| fruit                                                                                                           | not sure | 7               | 2           | 6          | 0             | 15              | 17                 |
|                                                                                                                 | more     | 207             | 193         | 71         | 87            | 546             | 669                |
|                                                                                                                 | same     | 82              | 76          | 70         | 32            | 270             | 260                |
|                                                                                                                 | less     | 11              | 24          | 13         | 5             | 42              | 53                 |
| Food and drinks with added sugar                                                                                | not sure | 0               | 0           | 1          | 0             | 5               | 15                 |
|                                                                                                                 | more     | 2               | 0           | 1          | 0             | 5               | 19                 |
|                                                                                                                 | same     | 0               | 1           | 2          | 2             | 21              | 77                 |
|                                                                                                                 | less     | 305             | 294         | 156        | 122           | 842             | 889                |
| Vegetables                                                                                                      | not sure | 0               | 0           | 1          | 0             | 4               | 11                 |
|                                                                                                                 | more     | 293             | 287         | 141        | 114           | 810             | 803                |
|                                                                                                                 | same     | 14              | 8           | 18         | 10            | 59              | 150                |

|                    |          |     |     |     |     |     |     |
|--------------------|----------|-----|-----|-----|-----|-----|-----|
|                    | less     | 0   | 0   | 0   | 0   | 0   | 36  |
| Fatty foods        | not sure | 3   | 4   | 3   | 0   | 10  | 18  |
|                    | more     | 2   | 2   | 1   | 2   | 7   | 24  |
|                    | same     | 27  | 40  | 17  | 15  | 84  | 164 |
|                    | less     | 275 | 249 | 139 | 107 | 772 | 794 |
| Processed red meat | not sure | 5   | 1   | 1   | 2   | 40  | 80  |
|                    | more     | 2   | 0   | 1   | 0   | 12  | 22  |
|                    | same     | 14  | 18  | 2   | 2   | 94  | 198 |
|                    | less     | 286 | 276 | 156 | 120 | 727 | 700 |
| Wholegrains        | not sure | 1   | 1   | 1   | 0   | 16  | 25  |
|                    | more     | 255 | 255 | 141 | 115 | 674 | 598 |
|                    | same     | 50  | 38  | 18  | 6   | 171 | 318 |
|                    | less     | 1   | 1   | 0   | 3   | 12  | 59  |
| Salty foods        | not sure | 1   | 2   | 1   | 0   | 12  | 32  |
|                    | more     | 1   | 0   | 0   | 1   | 2   | 26  |
|                    | same     | 22  | 16  | 10  | 8   | 61  | 161 |
|                    | less     | 283 | 277 | 149 | 115 | 798 | 781 |
| Water              | not sure | 2   | 1   | 5   | 2   | 7   | 10  |
|                    | more     | 236 | 229 | 110 | 73  | 743 | 824 |

|                                                                                                 |                               |     |     |     |     |     |     |
|-------------------------------------------------------------------------------------------------|-------------------------------|-----|-----|-----|-----|-----|-----|
|                                                                                                 | same                          | 67  | 64  | 44  | 48  | 120 | 151 |
|                                                                                                 | less                          | 2   | 1   | 1   | 1   | 3   | 15  |
| How many servings of fruit and vegetables per day do experts advise people to eat as a minimum? |                               |     |     |     |     |     |     |
| servings of fruit and vegetables per day                                                        | 2 servings                    | 22  | 8   | 8   | 2   | 60  | 312 |
|                                                                                                 | 3 servings                    | 40  | 29  | 1   | 10  | 203 | 285 |
|                                                                                                 | 4 servings                    | 36  | 25  | 0   | 1   | 108 | 90  |
|                                                                                                 | 5 or more servings            | 200 | 229 | 151 | 111 | 467 | 211 |
|                                                                                                 | not sure                      | 7   | 4   | 0   | 0   | 32  | 102 |
| Which of these types of fats do experts recommend that people should eat less of?               |                               |     |     |     |     |     |     |
| unsaturated fats                                                                                | not sure                      | 5   | 2   | 0   | 1   | 94  | 266 |
|                                                                                                 | eat less                      | 20  | 10  | 2   | 1   | 150 | 255 |
|                                                                                                 | not eat less                  | 282 | 282 | 158 | 122 | 629 | 479 |
| trans fats                                                                                      | not sure                      | 19  | 6   | 0   | 0   | 180 | 353 |
|                                                                                                 | eat less                      | 286 | 286 | 160 | 124 | 672 | 567 |
|                                                                                                 | not eat less                  | 2   | 3   | 0   | 0   | 20  | 80  |
| saturated fats                                                                                  | not sure                      | 9   | 4   | 0   | 0   | 113 | 268 |
|                                                                                                 | eat less                      | 280 | 274 | 159 | 121 | 607 | 531 |
|                                                                                                 | not eat less                  | 18  | 17  | 1   | 3   | 153 | 201 |
| Which type of dairy foods do experts say people should drink?                                   |                               |     |     |     |     |     |     |
|                                                                                                 | Full fat (e.g. full fat milk) | 50  | 69  | 21  | 11  | 176 | 175 |

|                                                                                                                                              |                                                  |     |     |     |     |     |     |
|----------------------------------------------------------------------------------------------------------------------------------------------|--------------------------------------------------|-----|-----|-----|-----|-----|-----|
|                                                                                                                                              | Reduced fat (e.g. skimmed and semi-skimmed milk) | 127 | 102 | 54  | 67  | 188 | 277 |
|                                                                                                                                              | Mixture of full fat and reduced fat              | 78  | 74  | 84  | 39  | 228 | 216 |
|                                                                                                                                              | Neither. dairy foods should be avoided           | 20  | 17  | 0   | 1   | 120 | 130 |
|                                                                                                                                              | Not sure                                         | 32  | 33  | 1   | 6   | 160 | 202 |
| How many times per week do experts recommend that people eat oily fish (e.g. salmon and mackerel)?                                           |                                                  |     |     |     |     |     |     |
|                                                                                                                                              | 1-2 times per week                               | 272 | 257 | 160 | 122 | 791 | 815 |
|                                                                                                                                              | 3-4 times per week                               | 29  | 34  | 0   | 1   | 42  | 65  |
|                                                                                                                                              | Every day                                        | 0   | 0   | 0   | 1   | 0   | 8   |
|                                                                                                                                              | Not sure                                         | 6   | 4   | 0   | 0   | 39  | 112 |
| Approximately how many alcoholic drinks is the maximum recommended per day (The exact number depends on the size and strength of the drink)? |                                                  |     |     |     |     |     |     |
|                                                                                                                                              | 1 drink each for men and women                   | 164 | 159 | 49  | 32  | 640 | 652 |
|                                                                                                                                              | 2 drinks each for men and women                  | 1   | 6   | 2   | 0   | 19  | 71  |
|                                                                                                                                              | 2 drinks for men and 1 drink for women           | 127 | 116 | 109 | 85  | 122 | 71  |
|                                                                                                                                              | 3 drinks for men and 2 drinks for women          | 2   | 0   | 0   | 3   | 5   | 8   |
|                                                                                                                                              | Not sure                                         | 13  | 14  | 0   | 4   | 86  | 198 |
| How many times per week do experts recommend that people eat breakfast?                                                                      |                                                  |     |     |     |     |     |     |
|                                                                                                                                              | 3 times per week                                 | 8   | 2   | 0   | 0   | 6   | 8   |
|                                                                                                                                              | 4 times per week                                 | 2   | 1   | 0   | 1   | 7   | 18  |
|                                                                                                                                              | Every day                                        | 284 | 273 | 157 | 118 | 829 | 932 |
|                                                                                                                                              | Not sure                                         | 13  | 19  | 3   | 5   | 30  | 42  |

| If a person has two glasses of fruit juice in a day. how many of their daily fruit and vegetable servings would this count as?                                                                                              |                     |     |     |     |     |     |     |
|-----------------------------------------------------------------------------------------------------------------------------------------------------------------------------------------------------------------------------|---------------------|-----|-----|-----|-----|-----|-----|
|                                                                                                                                                                                                                             | none                | 103 | 107 | 29  | 23  | 188 | 184 |
|                                                                                                                                                                                                                             | 1 serving           | 35  | 33  | 20  | 26  | 109 | 214 |
|                                                                                                                                                                                                                             | 2 servings          | 60  | 66  | 73  | 57  | 241 | 268 |
|                                                                                                                                                                                                                             | 3 servings          | 60  | 38  | 30  | 11  | 169 | 132 |
|                                                                                                                                                                                                                             | Not sure            | 49  | 51  | 8   | 7   | 166 | 202 |
| According to the food guide pyramid <sup>1</sup> (a guideline showing the proportions of food types people should eat to have a balanced and healthy diet). how much of a person's diet should be made up of starchy foods? |                     |     |     |     |     |     |     |
|                                                                                                                                                                                                                             | Quarter             | 105 | 119 | 72  | 23  | 331 | 311 |
|                                                                                                                                                                                                                             | Third               | 115 | 109 | 37  | 44  | 267 | 265 |
|                                                                                                                                                                                                                             | Half                | 55  | 43  | 49  | 51  | 98  | 63  |
|                                                                                                                                                                                                                             | Not sure            | 32  | 24  | 2   | 6   | 177 | 361 |
| Section 2: Experts classify foods into groups. We are interested to see whether people are aware of food groups and the nutrients they contain.                                                                             |                     |     |     |     |     |     |     |
| Do you think these foods and drinks are typically high or low in added sugar?                                                                                                                                               |                     |     |     |     |     |     |     |
| Diet cola drinks                                                                                                                                                                                                            | not sure            | 12  | 11  | 0   | 3   | 73  | 70  |
|                                                                                                                                                                                                                             | High in added sugar | 61  | 57  | 4   | 16  | 374 | 369 |
|                                                                                                                                                                                                                             | Low in added sugar  | 234 | 227 | 156 | 105 | 426 | 561 |
| Natural yoghurt                                                                                                                                                                                                             | not sure            | 2   | 4   | 1   | 0   | 8   | 50  |
|                                                                                                                                                                                                                             | High in added sugar | 12  | 10  | 0   | 7   | 41  | 66  |
|                                                                                                                                                                                                                             | Low in added sugar  | 293 | 281 | 159 | 117 | 824 | 884 |

<sup>1</sup> Wording was changed to Ernährungspyramide (food guide pyramid) since the "eatwell guide" is unknown in Austria

|                                                             |                     |     |     |     |     |     |     |
|-------------------------------------------------------------|---------------------|-----|-----|-----|-----|-----|-----|
| Icecream                                                    | not sure            | 1   | 1   | 0   | 0   | 2   | 20  |
|                                                             | High in added sugar | 306 | 294 | 160 | 123 | 867 | 952 |
|                                                             | Low in added sugar  | 0   | 0   | 0   | 1   | 4   | 28  |
| Tomato ketchup                                              | not sure            | 0   | 2   | 0   | 0   | 1   | 32  |
|                                                             | High in added sugar | 302 | 293 | 155 | 123 | 864 | 920 |
|                                                             | Low in added sugar  | 5   | 0   | 5   | 1   | 8   | 48  |
| Melon                                                       | not sure            | 15  | 12  | 2   | 1   | 31  | 78  |
|                                                             | High in added sugar | 123 | 111 | 42  | 39  | 236 | 364 |
|                                                             | Low in added sugar  | 169 | 172 | 116 | 84  | 606 | 558 |
| Do you think these foods are typically high or low in salt? |                     |     |     |     |     |     |     |
| Breakfast cereals                                           | not sure            | 35  | 33  | 3   | 9   | 148 | 235 |
|                                                             | High in salt        | 80  | 81  | 27  | 30  | 237 | 259 |
|                                                             | Low in salt         | 192 | 181 | 130 | 85  | 488 | 506 |
| Frozen vegetables                                           | not sure            | 17  | 12  | 4   | 4   | 43  | 134 |
|                                                             | High in salt        | 61  | 38  | 4   | 12  | 192 | 219 |
|                                                             | Low in salt         | 229 | 245 | 152 | 108 | 638 | 647 |
| Bread                                                       | not sure            | 18  | 20  | 1   | 0   | 66  | 126 |
|                                                             | High in salt        | 178 | 153 | 149 | 103 | 421 | 421 |
|                                                             | Low in salt         | 111 | 122 | 10  | 21  | 386 | 453 |

|                                                              |               |     |     |     |     |     |     |
|--------------------------------------------------------------|---------------|-----|-----|-----|-----|-----|-----|
| Baked beans <sup>2</sup>                                     | not sure      | 3   | 5   | 1   | 1   | 25  | 118 |
|                                                              | High in salt  | 299 | 286 | 158 | 118 | 821 | 775 |
|                                                              | Low in salt   | 5   | 4   | 1   | 5   | 27  | 107 |
| Red meat                                                     | not sure      | 12  | 10  | 1   | 6   | 107 | 198 |
|                                                              | High in salt  | 56  | 44  | 18  | 35  | 171 | 180 |
|                                                              | Low in salt   | 239 | 241 | 141 | 83  | 595 | 622 |
| Canned soup                                                  | not sure      | 0   | 1   | 0   | 1   | 11  | 96  |
|                                                              | High in salt  | 307 | 294 | 160 | 123 | 857 | 842 |
|                                                              | Low in salt   | 0   | 0   | 0   | 0   | 5   | 62  |
| Do you think these foods are typically high or low in fibre? |               |     |     |     |     |     |     |
| Oats                                                         | not sure      | 3   | 1   | 1   | 0   | 7   | 78  |
|                                                              | High in fibre | 303 | 292 | 159 | 122 | 850 | 846 |
|                                                              | Low in fibre  | 1   | 2   | 0   | 2   | 16  | 76  |
| Bananas                                                      | not sure      | 25  | 23  | 2   | 2   | 72  | 132 |
|                                                              | High in fibre | 135 | 140 | 83  | 86  | 473 | 586 |
|                                                              | Low in fibre  | 147 | 132 | 75  | 36  | 328 | 282 |
| White rice                                                   | not sure      | 6   | 6   | 1   | 1   | 35  | 122 |
|                                                              | High in fibre | 29  | 21  | 4   | 7   | 159 | 365 |

<sup>2</sup> Wording was changed to „Bohneneintopf in der Dose“ since baked beans are uncommon in Austria

|                                                        |                              |     |     |     |     |     |     |
|--------------------------------------------------------|------------------------------|-----|-----|-----|-----|-----|-----|
|                                                        | Low in fibre                 | 272 | 268 | 155 | 116 | 679 | 513 |
| Eggs                                                   | not sure                     | 6   | 6   | 2   | 1   | 78  | 186 |
|                                                        | High in fibre                | 1   | 4   | 0   | 2   | 58  | 238 |
|                                                        | Low in fibre                 | 300 | 285 | 158 | 121 | 737 | 576 |
| Potatoes with skin                                     | not sure                     | 8   | 12  | 2   | 1   | 60  | 124 |
|                                                        | High in fibre                | 248 | 251 | 140 | 115 | 730 | 693 |
|                                                        | Low in fibre                 | 51  | 32  | 18  | 8   | 83  | 183 |
| Pasta                                                  | not sure                     | 14  | 14  | 7   | 7   | 69  | 120 |
|                                                        | High in fibre                | 29  | 25  | 26  | 21  | 267 | 497 |
|                                                        | Low in fibre                 | 264 | 256 | 127 | 96  | 537 | 383 |
| Do you think these foods are a good source of protein? |                              |     |     |     |     |     |     |
| Poultry                                                | not sure                     | 2   | 2   | 0   | 1   | 35  | 81  |
|                                                        | Good source of protein       | 294 | 288 | 160 | 118 | 769 | 814 |
|                                                        | Not a good source of protein | 11  | 5   | 0   | 5   | 68  | 105 |
| Cheese                                                 | not sure                     | 5   | 6   | 2   | 0   | 37  | 79  |
|                                                        | Good source of protein       | 275 | 262 | 157 | 109 | 726 | 741 |
|                                                        | Not a good source of protein | 27  | 27  | 1   | 15  | 110 | 180 |
| Fruit                                                  | not sure                     | 2   | 5   | 0   | 1   | 42  | 119 |
|                                                        | Good source of protein       | 5   | 6   | 0   | 1   | 23  | 101 |
|                                                        | Not a good source of protein | 300 | 284 | 160 | 122 | 807 | 780 |



|                                                                 |                              |     |     |     |     |     |     |
|-----------------------------------------------------------------|------------------------------|-----|-----|-----|-----|-----|-----|
| Baked beans <sup>3</sup>                                        | not sure                     | 16  | 13  | 4   | 1   | 76  | 171 |
|                                                                 | Good source of protein       | 156 | 157 | 140 | 97  | 365 | 255 |
|                                                                 | Not a good source of protein | 135 | 125 | 16  | 26  | 432 | 574 |
| Butter                                                          | not sure                     | 6   | 6   | 0   | 0   | 64  | 144 |
|                                                                 | Good source of protein       | 36  | 17  | 0   | 7   | 179 | 283 |
|                                                                 | Not a good source of protein | 265 | 272 | 160 | 117 | 630 | 573 |
| Nuts                                                            | not sure                     | 16  | 19  | 3   | 3   | 65  | 110 |
|                                                                 | Good source of protein       | 225 | 216 | 118 | 86  | 626 | 749 |
|                                                                 | Not a good source of protein | 66  | 60  | 39  | 35  | 181 | 141 |
| Which of the following foods do experts count as starchy foods? |                              |     |     |     |     |     |     |
| Cheese                                                          | not sure                     | 3   | 1   | 0   | 0   | 42  | 161 |
|                                                                 | Starchy food                 | 19  | 9   | 0   | 1   | 68  | 240 |
|                                                                 | Not a starchy food           | 285 | 285 | 160 | 123 | 763 | 599 |
| Pasta                                                           | not sure                     | 0   | 0   | 0   | 0   | 3   | 47  |
|                                                                 | Starchy food                 | 303 | 294 | 160 | 124 | 866 | 921 |
|                                                                 | Not a starchy food           | 4   | 1   | 0   | 0   | 4   | 32  |
| Potatoes                                                        | not sure                     | 1   | 2   | 0   | 0   | 5   | 70  |
|                                                                 | Starchy food                 | 300 | 286 | 160 | 123 | 827 | 835 |

<sup>3</sup> Wording was changed to „Bohneneintopf in der Dose“ since baked beans are uncommon in Austria

|                                                               |                     |     |     |     |     |     |     |
|---------------------------------------------------------------|---------------------|-----|-----|-----|-----|-----|-----|
|                                                               | Not a starchy food  | 6   | 7   | 0   | 1   | 41  | 95  |
| Nuts                                                          | not sure            | 14  | 8   | 1   | 2   | 61  | 133 |
|                                                               | Starchy food        | 46  | 31  | 4   | 9   | 200 | 470 |
|                                                               | Not a starchy food  | 247 | 256 | 155 | 113 | 612 | 397 |
| Sweet potatoe <sup>4</sup>                                    | not sure            | 16  | 12  | 2   | 3   | 97  | 179 |
|                                                               | Starchy food        | 266 | 257 | 151 | 109 | 616 | 591 |
|                                                               | Not a starchy food  | 25  | 26  | 7   | 12  | 160 | 230 |
| Which is the main type of fat present in each of these foods? |                     |     |     |     |     |     |     |
| Olive oil                                                     | not sure            | 9   | 2   | 0   | 3   | 134 | 314 |
|                                                               | Polyunsaturated fat | 243 | 212 | 57  | 55  | 537 | 412 |
|                                                               | Monounsaturated fat | 51  | 80  | 103 | 62  | 138 | 165 |
|                                                               | Saturated fat       | 4   | 1   | 0   | 4   | 61  | 100 |
|                                                               | Cholesterol         | 0   | 0   | 0   | 0   | 3   | 9   |
| Butter                                                        | not sure            | 14  | 7   | 0   | 1   | 140 | 290 |
|                                                               | Polyunsaturated fat | 7   | 4   | 1   | 0   | 42  | 105 |
|                                                               | Monounsaturated fat | 30  | 16  | 1   | 3   | 84  | 129 |
|                                                               | Saturated fat       | 190 | 231 | 148 | 114 | 391 | 283 |
|                                                               | Cholesterol         | 66  | 37  | 10  | 6   | 216 | 193 |

---

<sup>4</sup> Changed to sweet potatoe since plantains are uncommon in Austria

|                                                                                        |                              |     |     |     |     |     |     |
|----------------------------------------------------------------------------------------|------------------------------|-----|-----|-----|-----|-----|-----|
| Sunflower oil                                                                          | not sure                     | 13  | 7   | 0   | 2   | 162 | 319 |
|                                                                                        | Polyunsaturated fat          | 117 | 117 | 90  | 46  | 210 | 180 |
|                                                                                        | Monounsaturated fat          | 145 | 157 | 69  | 70  | 358 | 295 |
|                                                                                        | Saturated fat                | 32  | 14  | 1   | 6   | 124 | 164 |
|                                                                                        | Cholesterol                  | 0   | 0   | 0   | 0   | 19  | 42  |
| Eggs                                                                                   | not sure                     | 22  | 15  | 3   | 4   | 193 | 359 |
|                                                                                        | Polyunsaturated fat          | 7   | 8   | 0   | 1   | 24  | 67  |
|                                                                                        | Monounsaturated fat          | 34  | 22  | 3   | 4   | 90  | 116 |
|                                                                                        | Saturated fat                | 36  | 25  | 62  | 30  | 99  | 107 |
|                                                                                        | Cholesterol                  | 208 | 225 | 92  | 85  | 467 | 351 |
| Which of these foods has the most trans-fat?                                           |                              |     |     |     |     |     |     |
|                                                                                        | Biscuits. cakes and pastries | 271 | 284 | 159 | 120 | 680 | 486 |
|                                                                                        | Fish                         | 11  | 1   | 0   | 0   | 29  | 97  |
|                                                                                        | Rapeseed oil                 | 7   | 4   | 0   | 2   | 23  | 85  |
|                                                                                        | Eggs                         | 0   | 1   | 0   | 0   | 1   | 12  |
|                                                                                        | Not sure                     | 18  | 5   | 1   | 2   | 140 | 320 |
| The amount of calcium in a glass of whole milk compared to a glass of skimmed milk is: |                              |     |     |     |     |     |     |
|                                                                                        | About the same               | 234 | 227 | 152 | 99  | 533 | 410 |
|                                                                                        | Much higher                  | 17  | 15  | 2   | 8   | 118 | 265 |
|                                                                                        | Much lower                   | 11  | 11  | 1   | 4   | 28  | 78  |

|                                                                                                    |                                                                                                                           |     |     |     |     |     |     |
|----------------------------------------------------------------------------------------------------|---------------------------------------------------------------------------------------------------------------------------|-----|-----|-----|-----|-----|-----|
|                                                                                                    | Not sure                                                                                                                  | 45  | 42  | 5   | 13  | 194 | 247 |
| Which one of the following nutrients has the most calories for the same weight of food?            |                                                                                                                           |     |     |     |     |     |     |
|                                                                                                    | sugar                                                                                                                     | 77  | 64  | 1   | 6   | 313 | 414 |
|                                                                                                    | starch                                                                                                                    | 9   | 9   | 0   | 2   | 52  | 82  |
|                                                                                                    | dietary fiber                                                                                                             | 0   | 1   | 0   | 2   | 24  | 60  |
|                                                                                                    | fat                                                                                                                       | 215 | 212 | 158 | 110 | 370 | 290 |
|                                                                                                    | not sure                                                                                                                  | 6   | 9   | 1   | 4   | 113 | 154 |
| Compared to minimally processed foods, processed foods are:                                        |                                                                                                                           |     |     |     |     |     |     |
|                                                                                                    | Higher in calories                                                                                                        | 266 | 252 | 150 | 111 | 649 | 212 |
|                                                                                                    | Higher in fibre                                                                                                           | 5   | 4   | 1   | 1   | 54  | 104 |
|                                                                                                    | Lower in salt                                                                                                             | 27  | 28  | 7   | 9   | 64  | 431 |
|                                                                                                    | Not sure                                                                                                                  | 9   | 11  | 2   | 3   | 105 | 253 |
| Section 3: The next few items are about choosing foods                                             |                                                                                                                           |     |     |     |     |     |     |
| If a person wanted to buy a yogurt at the supermarket, which would have the least sugar/sweetener? |                                                                                                                           |     |     |     |     |     |     |
|                                                                                                    | 0% fat cherry yogurt                                                                                                      | 1   | 1   | 1   | 1   | 12  | 61  |
|                                                                                                    | Natural yogurt                                                                                                            | 306 | 294 | 158 | 122 | 846 | 837 |
|                                                                                                    | Creamy fruit yogurt                                                                                                       | 0   | 0   | 0   | 1   | 2   | 23  |
|                                                                                                    | Not sure                                                                                                                  | 0   | 0   | 1   | 0   | 13  | 79  |
| If a person wanted soup in a restaurant or cafe, which one would be the lowest fat option?         |                                                                                                                           |     |     |     |     |     |     |
|                                                                                                    | Mushroom risotto soup (field mushrooms, porcini mushrooms, arborio rice, butter, cream, parsley and cracked black pepper) | 5   | 1   | 1   | 0   | 21  | 70  |

|                                                                                         |                                                                                                                                     |     |     |     |     |     |     |
|-----------------------------------------------------------------------------------------|-------------------------------------------------------------------------------------------------------------------------------------|-----|-----|-----|-----|-----|-----|
|                                                                                         | Carrot butternut and spice soup (carrot . butternut squash. sweet potato. cumin. red chillies. coriander seeds and lemon)           | 290 | 289 | 158 | 122 | 801 | 665 |
|                                                                                         | Cream of chicken soup (British chicken <sup>5</sup> . onions. carrots. celery. ≤ potatoes. garlic. sage. wheat flour. double cream) | 10  | 4   | 0   | 1   | 30  | 139 |
|                                                                                         | Not sure                                                                                                                            | 2   | 1   | 1   | 1   | 21  | 126 |
| Which would be the healthiest and most balanced choice for a main meal in a restaurant? |                                                                                                                                     |     |     |     |     |     |     |
|                                                                                         | Roast turkey. mashed potatoes and vegetables                                                                                        | 291 | 276 | 157 | 117 | 794 | 729 |
|                                                                                         | Beef. Yorkshire pudding and roast potatoes <sup>6</sup>                                                                             | 12  | 16  | 2   | 5   | 55  | 151 |
|                                                                                         | Fish and chips served with peas and tartar sauce                                                                                    | 2   | 2   | 0   | 0   | 3   | 54  |
|                                                                                         | Not sure                                                                                                                            | 2   | 1   | 1   | 2   | 21  | 66  |
| Which would be the healthiest and most balanced sandwich lunch?                         |                                                                                                                                     |     |     |     |     |     |     |
|                                                                                         | Ham sandwich + fruit + blueberry muffin + fruit juice                                                                               | 7   | 3   | 1   | 0   | 20  | 67  |
|                                                                                         | Tuna salad sandwich + fruit + low fat yogurt + water                                                                                | 293 | 290 | 159 | 124 | 834 | 840 |
|                                                                                         | Egg salad sandwich + crisps + low fat yogurt + water                                                                                | 1   | 0   | 0   | 0   | 2   | 29  |
|                                                                                         | Not sure                                                                                                                            | 6   | 2   | 0   | 0   | 15  | 64  |
| Which of these foods would be the healthiest choice for a pudding?                      |                                                                                                                                     |     |     |     |     |     |     |

<sup>5</sup> „British chicken“ was changed to Hühnerfleisch aus Österreich

<sup>6</sup> Wording was changed to „Tafelspitz mit Semmelkren und Bratkartoffeln“ since Yorkshire Pudding is uncommon in Austria

|                                                                                                                                                        |                                       |     |     |     |     |     |     |
|--------------------------------------------------------------------------------------------------------------------------------------------------------|---------------------------------------|-----|-----|-----|-----|-----|-----|
|                                                                                                                                                        | Berry sorbet                          | 236 | 214 | 131 | 104 | 605 | 502 |
|                                                                                                                                                        | Apple and blackberry pie              | 7   | 13  | 6   | 1   | 35  | 62  |
|                                                                                                                                                        | Lemon cheesecake                      | 4   | 2   | 3   | 2   | 19  | 42  |
|                                                                                                                                                        | Carrot cake with cream cheese topping | 43  | 40  | 12  | 8   | 140 | 263 |
|                                                                                                                                                        | Not sure                              | 17  | 26  | 8   | 9   | 74  | 131 |
| Which of these combinations of vegetables in a salad would give the greatest variety of vitamins and antioxidants?                                     |                                       |     |     |     |     |     |     |
|                                                                                                                                                        | Lettuce, green peppers and cabbage    | 42  | 23  | 18  | 6   | 127 | 161 |
|                                                                                                                                                        | Broccoli, carrot and tomatoes         | 190 | 226 | 120 | 88  | 500 | 445 |
|                                                                                                                                                        | Red peppers, tomatoes and lettuce     | 31  | 35  | 6   | 17  | 98  | 205 |
|                                                                                                                                                        | Not sure                              | 44  | 11  | 16  | 13  | 148 | 189 |
| If a person wanted to reduce the amount of fat in their diet, but didn't want to give up chips, which of the following foods would be the best choice? |                                       |     |     |     |     |     |     |
|                                                                                                                                                        | Thick cut chips                       | 231 | 231 | 126 | 86  | 561 | 366 |
|                                                                                                                                                        | Thin cut chips                        | 21  | 20  | 13  | 20  | 65  | 202 |
|                                                                                                                                                        | Crinkle cut chips                     | 10  | 3   | 4   | 4   | 34  | 87  |
|                                                                                                                                                        | Not sure                              | 45  | 41  | 17  | 14  | 213 | 345 |
| One healthy way to add flavour to food without adding extra fat or salt is                                                                             |                                       |     |     |     |     |     |     |
|                                                                                                                                                        | Coconut milk                          | 1   | 0   | 0   | 0   | 12  | 72  |
|                                                                                                                                                        | Herbs                                 | 300 | 292 | 159 | 123 | 817 | 753 |
|                                                                                                                                                        | Soya sauce                            | 3   | 2   | 1   | 1   | 31  | 88  |

|                                                                                                            |             |     |     |     |     |     |     |
|------------------------------------------------------------------------------------------------------------|-------------|-----|-----|-----|-----|-----|-----|
|                                                                                                            | Not sure    | 3   | 1   | 0   | 0   | 13  | 87  |
| Which of the following cooking methods requires fat to be added?                                           |             |     |     |     |     |     |     |
|                                                                                                            | Grilling    | 2   | 5   | 3   | 0   | 10  | 44  |
|                                                                                                            | Steaming    | 1   | 0   | 0   | 2   | 4   | 55  |
|                                                                                                            | Baking      | 60  | 39  | 33  | 7   | 138 | 141 |
|                                                                                                            | Saut  ing   | 239 | 249 | 119 | 113 | 706 | 760 |
|                                                                                                            | Not sure    | 5   | 2   | 5   | 2   | 15  | 0   |
| Traffic lights are often used on nutrition labelling. what would amber mean for the fat content of a food? |             |     |     |     |     |     |     |
|                                                                                                            | Low fat     | 4   | 0   | 1   | 3   | 8   | 36  |
|                                                                                                            | Medium fat  | 262 | 273 | 157 | 116 | 738 | 703 |
|                                                                                                            | High in fat | 10  | 1   | 0   | 1   | 10  | 44  |
|                                                                                                            | Not sure    | 31  | 21  | 2   | 4   | 117 | 217 |
|   Light   foods (or Diet foods) are always good options because they are low in calories.                  |             |     |     |     |     |     |     |
|                                                                                                            | Agree       | 15  | 8   | 6   | 14  | 36  | 138 |
|                                                                                                            | Disagree    | 281 | 282 | 154 | 105 | 796 | 706 |
|                                                                                                            | Not sure    | 11  | 5   | 0   | 5   | 41  | 156 |
| Looking at products 1 and 2. which one has the most calories (kcal) per 100 grams                          |             |     |     |     |     |     |     |
|                                                                                                            | Product 1   | 239 | 253 | 134 | 95  | 660 | 556 |
|                                                                                                            | Product 2   | 51  | 34  | 23  | 24  | 158 | 308 |

|                                                                                                    |                                |     |     |     |     |     |     |
|----------------------------------------------------------------------------------------------------|--------------------------------|-----|-----|-----|-----|-----|-----|
|                                                                                                    | Both have the same quantity    | 7   | 4   | 3   | 5   | 17  | 51  |
|                                                                                                    | Not sure                       | 10  | 4   | 0   | 0   | 37  | 85  |
| Looking at product 1. what are the sources of sugar in the ingredient list?                        |                                |     |     |     |     |     |     |
|                                                                                                    | Sugar and malt syrup           | 13  | 13  | 1   | 7   | 39  | 118 |
|                                                                                                    | Sugar. fructose and lecithin   | 2   | 0   | 0   | 0   | 21  | 89  |
|                                                                                                    | Sugar. fructose and malt syrup | 287 | 280 | 159 | 116 | 783 | 638 |
|                                                                                                    | Not sure                       | 5   | 2   | 0   | 1   | 30  | 155 |
| Section 4: This section is about health problems or diseases related to diet and weight management |                                |     |     |     |     |     |     |
| Which of these diseases is related to a low intake of fibre?                                       |                                |     |     |     |     |     |     |
|                                                                                                    | Bowel disorders                | 297 | 294 | 156 | 122 | 777 | 664 |
|                                                                                                    | Anaemia                        | 1   | 0   | 0   | 1   | 25  | 68  |
|                                                                                                    | Tooth decay                    | 6   | 1   | 4   | 0   | 2   | 37  |
|                                                                                                    | Not sure                       | 3   | 0   | 0   | 1   | 69  | 231 |
| Which of these diseases is related to how much sugar people eat?                                   |                                |     |     |     |     |     |     |
|                                                                                                    | High blood pressure            | 18  | 7   | 2   | 2   | 103 | 278 |
|                                                                                                    | Tooth decay                    | 286 | 285 | 157 | 120 | 733 | 616 |
|                                                                                                    | Anaemia                        | 1   | 0   | 0   | 0   | 3   | 17  |
|                                                                                                    | Not sure                       | 2   | 3   | 1   | 2   | 34  | 89  |
| Which of these diseases is related to how much salt (or sodium) people eat?                        |                                |     |     |     |     |     |     |
|                                                                                                    | Hypothyroidism                 | 3   | 3   | 2   | 1   | 132 | 258 |



|                                                                                      |                                |     |     |     |     |     |     |
|--------------------------------------------------------------------------------------|--------------------------------|-----|-----|-----|-----|-----|-----|
|                                                                                      | Diabetes                       | 0   | 0   | 0   | 0   | 4   | 56  |
|                                                                                      | High blood pressure            | 303 | 291 | 158 | 122 | 615 | 489 |
|                                                                                      | Not sure                       | 1   | 1   | 0   | 1   | 122 | 197 |
| Which of these options do experts recommend to reduce the chances of getting cancer? |                                |     |     |     |     |     |     |
|                                                                                      | drinking alcohol regularly     | 0   | 0   | 0   | 0   | 3   | 21  |
|                                                                                      | eating less red meat           | 224 | 194 | 154 | 121 | 375 | 448 |
|                                                                                      | avoding additives in food      | 74  | 92  | 4   | 2   | 416 | 373 |
|                                                                                      | not sure                       | 9   | 9   | 2   | 1   | 79  | 158 |
| Which of these options do experts recommend to prevent heart disease?                |                                |     |     |     |     |     |     |
|                                                                                      | Taking nutritional supplements | 1   | 1   | 0   | 1   | 3   | 37  |
|                                                                                      | Eating less oily fish          | 11  | 3   | 0   | 1   | 29  | 107 |
|                                                                                      | Eating less trans-fats         | 293 | 290 | 160 | 120 | 787 | 693 |
|                                                                                      | Not sure                       | 2   | 1   | 0   | 2   | 54  | 163 |
| Which of these options do experts recommend to prevent diabetes?                     |                                |     |     |     |     |     |     |
|                                                                                      | Eating less refined foods      | 302 | 294 | 159 | 121 | 788 | 722 |
|                                                                                      | Drinking more fruit juice      | 2   | 1   | 1   | 1   | 14  | 55  |
|                                                                                      | Eating more processed meat     | 1   | 0   | 0   | 1   | 6   | 28  |
|                                                                                      | Not sure                       | 2   | 0   | 0   | 1   | 65  | 195 |
| Which one of these foods is more likely to raise people's blood cholesterol?         |                                |     |     |     |     |     |     |

|                                                                                                                                                                                                                                     |                      |     |     |     |     |     |     |
|-------------------------------------------------------------------------------------------------------------------------------------------------------------------------------------------------------------------------------------|----------------------|-----|-----|-----|-----|-----|-----|
|                                                                                                                                                                                                                                     | Eggs                 | 47  | 39  | 5   | 16  | 123 | 217 |
|                                                                                                                                                                                                                                     | Vegetable oils       | 1   | 2   | 1   | 1   | 12  | 59  |
|                                                                                                                                                                                                                                     | Animal fat           | 254 | 250 | 154 | 105 | 681 | 593 |
|                                                                                                                                                                                                                                     | Not sure             | 5   | 4   | 0   | 2   | 57  | 131 |
| Which one of these foods is classified as having a high Glycaemic Index (Glycaemic Index is a measure of the impact of a food on blood sugar levels. thus a high Glycaemic Index means a greater rise in blood sugar after eating)? |                      |     |     |     |     |     |     |
|                                                                                                                                                                                                                                     | Wholegrain cereals   | 12  | 8   | 6   | 3   | 56  | 82  |
|                                                                                                                                                                                                                                     | white bread          | 287 | 281 | 153 | 119 | 706 | 603 |
|                                                                                                                                                                                                                                     | Fruit and vegetables | 5   | 4   | 1   | 1   | 21  | 64  |
|                                                                                                                                                                                                                                     | Not sure             | 3   | 2   | 0   | 1   | 90  | 251 |
| To maintain a healthy weight people should cut fat out completely                                                                                                                                                                   |                      |     |     |     |     |     |     |
|                                                                                                                                                                                                                                     | agree                | 3   | 2   | 0   | 0   | 13  | 91  |
|                                                                                                                                                                                                                                     | Disagree             | 302 | 292 | 160 | 124 | 852 | 828 |
|                                                                                                                                                                                                                                     | Not sure             | 2   | 1   | 0   | 0   | 8   | 81  |
| To maintain a healthy weight people should eat a high protein diet.                                                                                                                                                                 |                      |     |     |     |     |     |     |
|                                                                                                                                                                                                                                     | agree                | 193 | 198 | 73  | 56  | 571 | 631 |
|                                                                                                                                                                                                                                     | Disagree             | 101 | 79  | 83  | 65  | 214 | 207 |
|                                                                                                                                                                                                                                     | Not sure             | 13  | 18  | 4   | 3   | 88  | 162 |
| Eating bread always causes weight gain.                                                                                                                                                                                             |                      |     |     |     |     |     |     |

|                                                                      |          |     |     |     |     |     |     |
|----------------------------------------------------------------------|----------|-----|-----|-----|-----|-----|-----|
|                                                                      | agree    | 11  | 8   | 0   | 1   | 53  | 146 |
|                                                                      | Disagree | 289 | 284 | 160 | 123 | 791 | 759 |
|                                                                      | Not sure | 7   | 3   | 0   | 0   | 29  | 95  |
| Fibre can decrease the chances of gaining weight.                    |          |     |     |     |     |     |     |
|                                                                      | agree    | 258 | 262 | 151 | 114 | 612 | 517 |
|                                                                      | Disagree | 24  | 20  | 9   | 7   | 123 | 210 |
|                                                                      | Not sure | 25  | 13  | 0   | 3   | 138 | 273 |
| Which of these options can help people to maintain a healthy weight? |          |     |     |     |     |     |     |
| Not eating while watching TV                                         | not sure | 2   | 2   | 0   | 0   | 13  | 47  |
|                                                                      | Yes      | 275 | 272 | 143 | 109 | 778 | 806 |
|                                                                      | No       | 28  | 21  | 17  | 15  | 77  | 147 |
| Reading food labels                                                  | not sure | 7   | 6   | 0   | 2   | 12  | 49  |
|                                                                      | Yes      | 286 | 282 | 152 | 113 | 829 | 860 |
|                                                                      | No       | 10  | 7   | 8   | 9   | 29  | 91  |
| Taking nutritional supplements                                       | not sure | 10  | 18  | 0   | 4   | 55  | 121 |
|                                                                      | Yes      | 8   | 41  | 0   | 5   | 45  | 167 |
|                                                                      | No       | 285 | 234 | 160 | 115 | 766 | 712 |
| Monitoring their eating                                              | not sure | 4   | 1   | 1   | 1   | 6   | 37  |
|                                                                      | Yes      | 300 | 290 | 156 | 117 | 856 | 927 |

|                                                                                                    |               |     |     |     |     |     |     |
|----------------------------------------------------------------------------------------------------|---------------|-----|-----|-----|-----|-----|-----|
|                                                                                                    | No            | 2   | 4   | 3   | 6   | 7   | 36  |
| Monitoring their weight                                                                            | not sure      | 8   | 11  | 4   | 1   | 19  | 36  |
|                                                                                                    | Yes           | 272 | 265 | 141 | 115 | 781 | 900 |
|                                                                                                    | No            | 25  | 19  | 15  | 8   | 68  | 64  |
| Grazing throughout the day                                                                         | not sure      | 1   | 0   | 0   | 0   | 4   | 32  |
|                                                                                                    | Yes           | 1   | 1   | 1   | 0   | 3   | 29  |
|                                                                                                    | No            | 301 | 292 | 159 | 124 | 859 | 939 |
| If someone has a Body Mass Index (BMI) of 23kg/m <sup>2</sup> . what would their weight status be? |               |     |     |     |     |     |     |
|                                                                                                    | underweight   | 6   | 7   | 0   | 0   | 24  | 60  |
|                                                                                                    | normal weight | 277 | 248 | 159 | 123 | 565 | 469 |
|                                                                                                    | overweight    | 17  | 31  | 1   | 1   | 71  | 115 |
|                                                                                                    | obese         | 0   | 1   | 0   | 0   | 2   | 356 |
|                                                                                                    | not sure      | 7   | 8   | 0   | 0   | 211 | 0   |
| If someone has a Body Mass Index (BMI) of 31kg/m <sup>2</sup> . what would their weight status be? |               |     |     |     |     |     |     |
|                                                                                                    | underweight   | 1   | 0   | 0   | 0   | 4   | 14  |
|                                                                                                    | normal weight | 2   | 2   | 0   | 1   | 17  | 57  |
|                                                                                                    | overweight    | 82  | 80  | 17  | 32  | 310 | 614 |
|                                                                                                    | obese         | 220 | 205 | 143 | 91  | 343 | 315 |
|                                                                                                    | not sure      | 2   | 8   | 0   | 0   | 199 | 0   |

|                                                                                                                                                                                                                                                                            |             |     |     |     |     |     |     |
|----------------------------------------------------------------------------------------------------------------------------------------------------------------------------------------------------------------------------------------------------------------------------|-------------|-----|-----|-----|-----|-----|-----|
| Which of these body shapes increases the risk of cardiovascular disease<br>(Cardiovascular disease is a general term that describes a disease of the heart of<br>blood vessels. for example. angina. heart attack. heart failure. congenital heart<br>disease and stroke)? |             |     |     |     |     |     |     |
|                                                                                                                                                                                                                                                                            | Apple shape | 293 | 285 | 159 | 122 | 773 | 801 |
|                                                                                                                                                                                                                                                                            | Pear shape  | 11  | 9   | 1   | 1   | 25  | 85  |
|                                                                                                                                                                                                                                                                            | Not sure    | 3   | 1   | 0   | 1   | 75  | 114 |
